# Supplementary material
Source: publisher site journal article supplement (https://www.dovepress.com/article/315822)

**Supplement.** Histograms Wound-QoL global score and subscale scores differences T2–T1

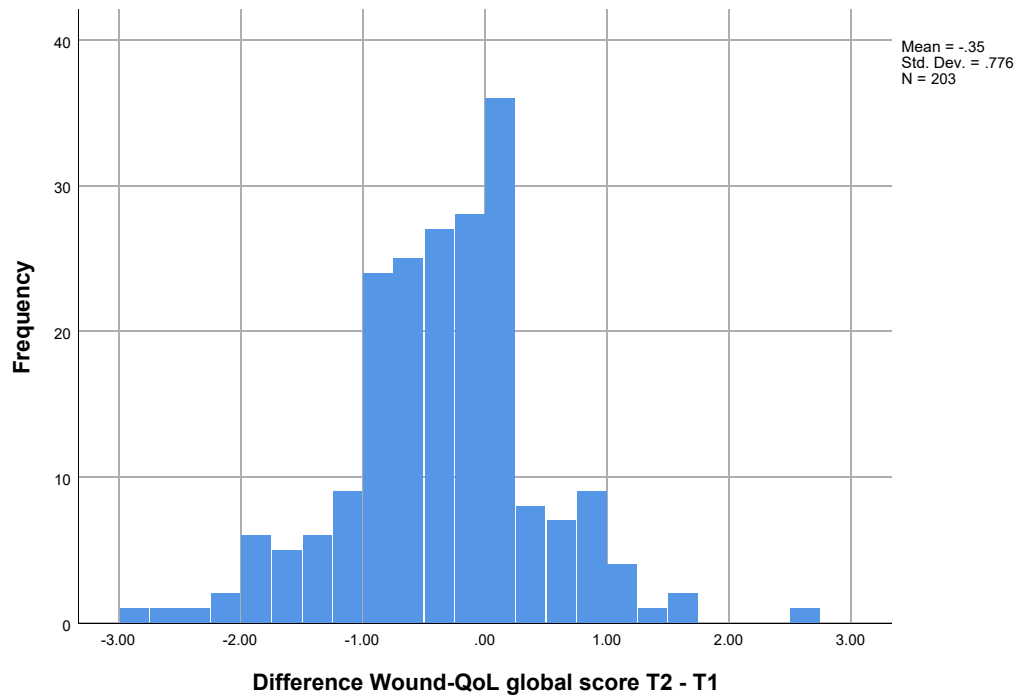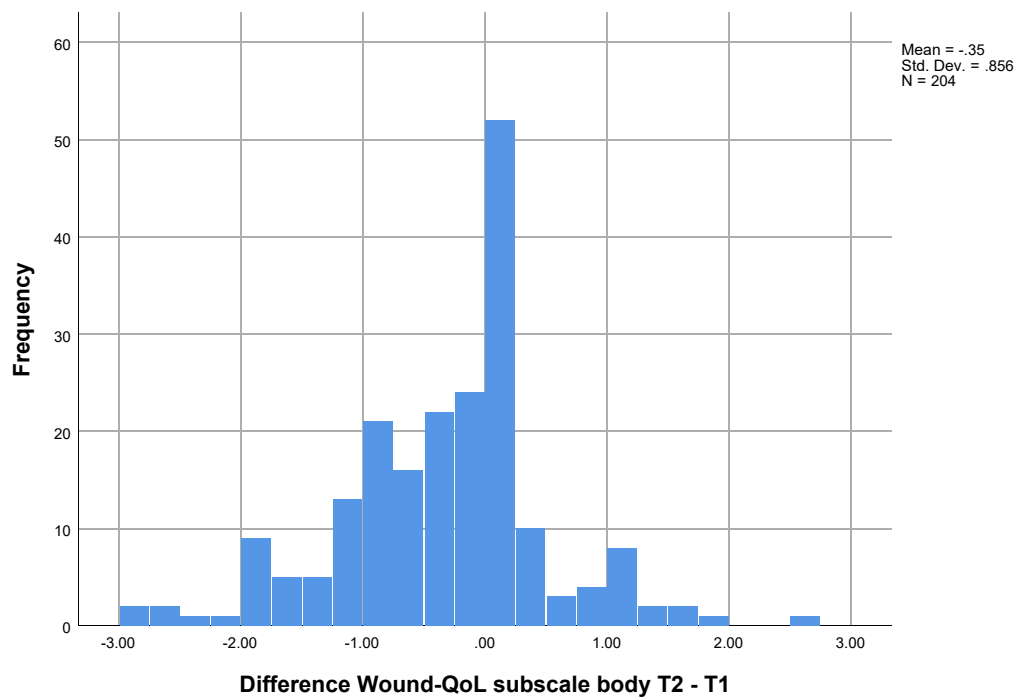

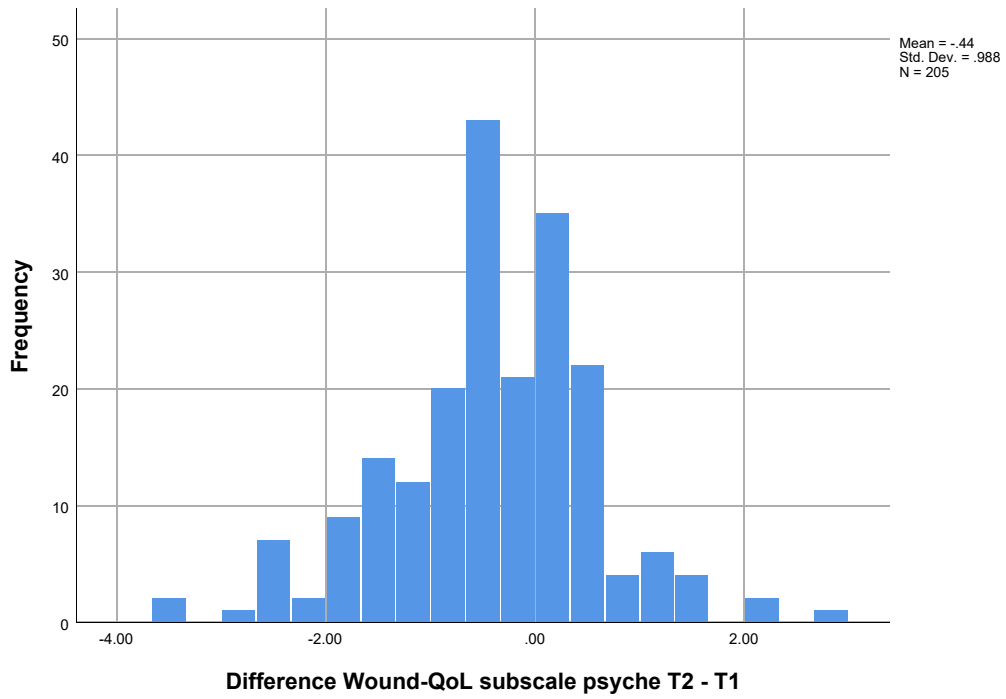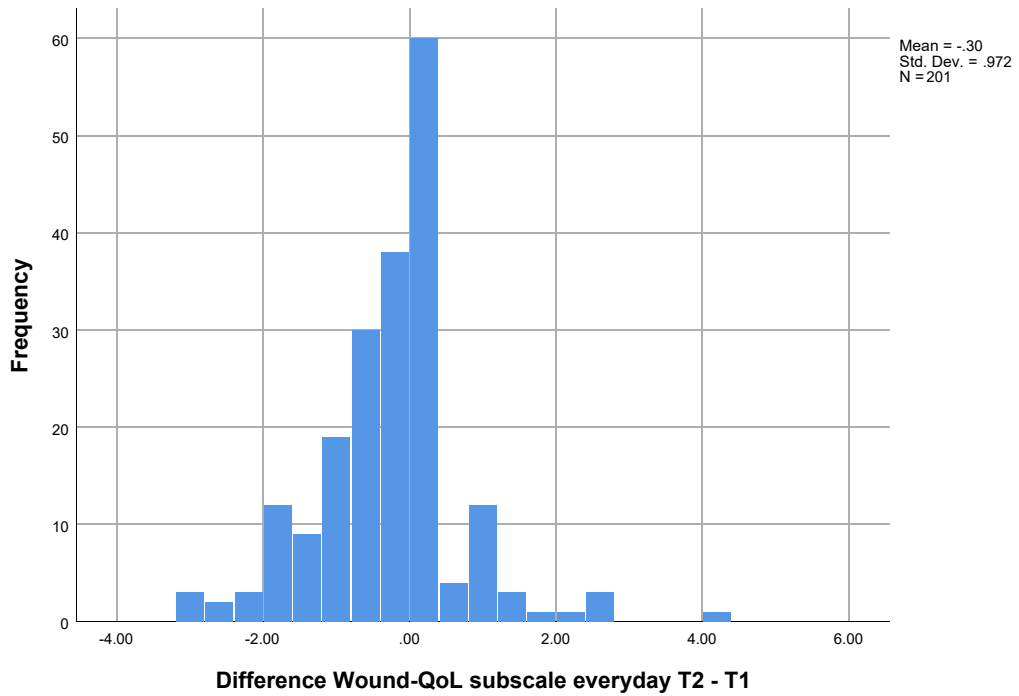

Supplement: Supplementary file 1 [file get_supplementary_file.php]
